# Supplementary material
Source: Royal Society of Chemistry journal article supplement (doi:10.1039/d5qi02535d)
Supplement: d5qi02535d1.pdf [file d5qi02535d1.pdf]

## Supporting Information

# Activation of residual sodium via in-situ neutralization toward practical layered oxides

*Xingjie Shao<sup>a,b, †</sup>, Zhanhao Zhang<sup>a,b, †</sup>, Xunmin Gu<sup>a,b</sup>, Lei Ran<sup>a,b</sup>, Yuchen Duan<sup>a,b</sup>, Yubin*

*Niu<sup>a,b,\*</sup>, Maowen Xu<sup>a,b,\*</sup>*

a. School of Materials and Energy, Southwest University, Chongqing 400715, PR China

b. Chongqing Key Laboratory of Battery Materials and Technologies, Chongqing 400715,

PR China

Email: niuyubin@swu.edu.cn (Yubin Niu)

Email: xumaowen@swu.edu.cn (Maowen Xu)

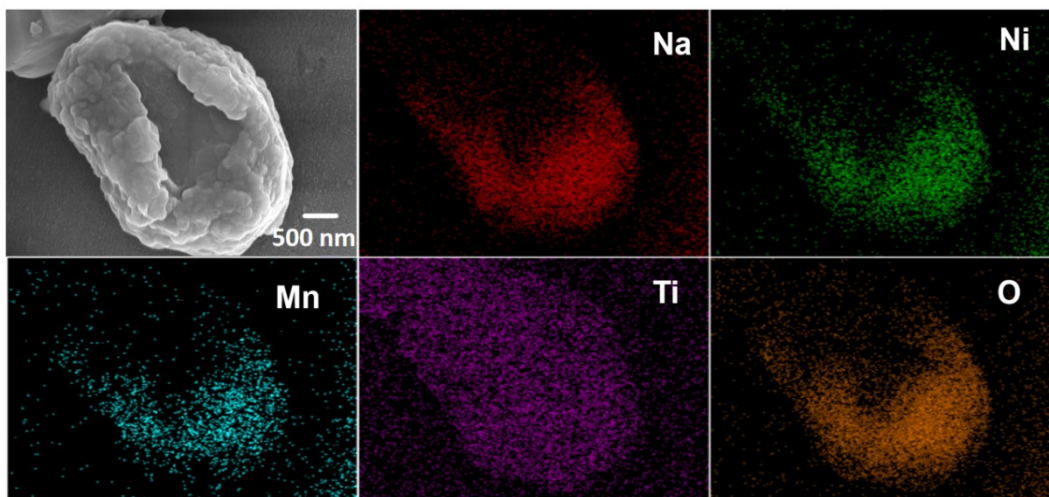

**Figure. S1.** EDS mapping images of P2-NMT.

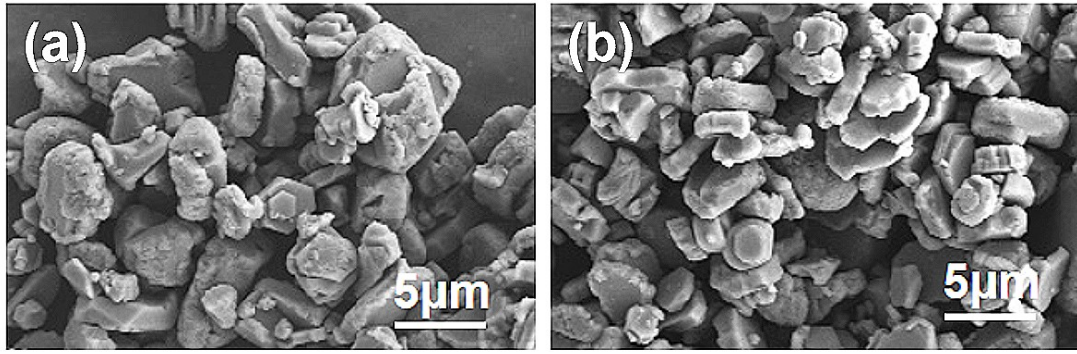

**Figure. S2.** SEM images of (a) NMT and (b) NMT@IDA.

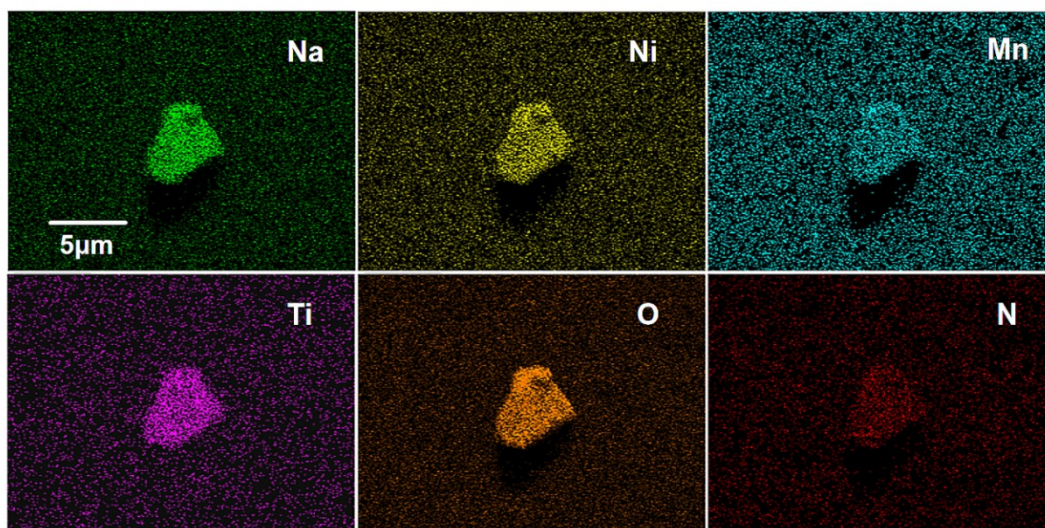

**Figure. S3.** EDS mapping images of P2-NMT@IDA.

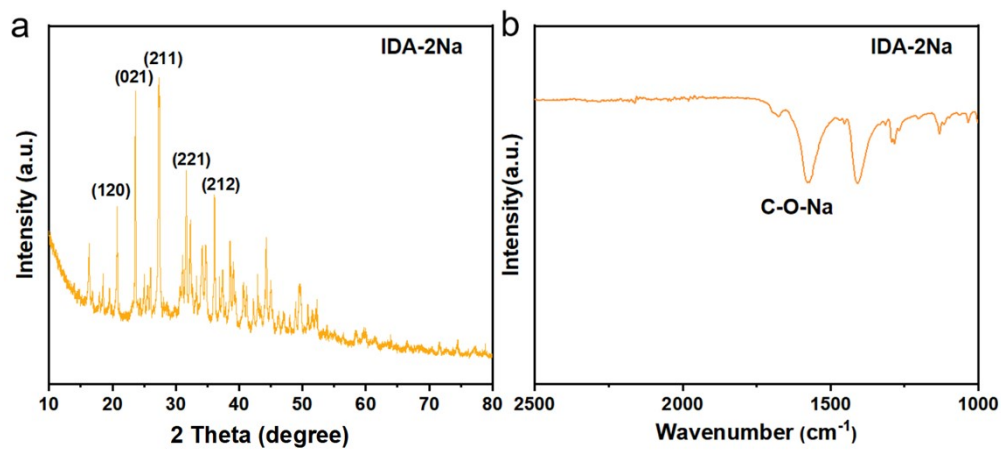

**Figure. S4.** (a) XRD patterns of IDA-2Na, (b) Fourier transform infrared spectroscopy (FTIR) patterns of IDA-2Na.

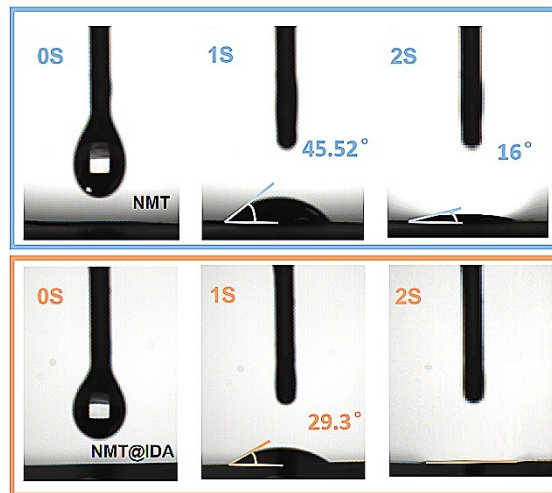

**Figure. S5.** The wetting snapshot of electrolyte droplets of (a) P2-NMT and (b) P2-NMT@IDA electrodes.

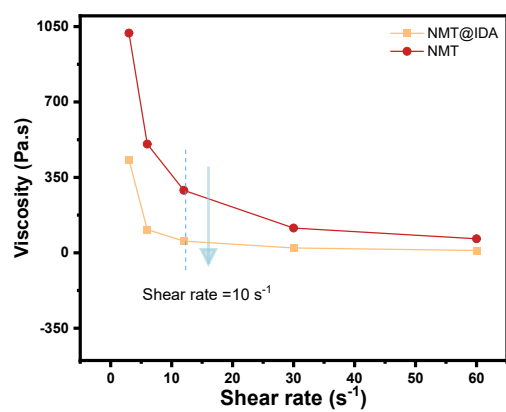

**Figure. S6.** Oscillatory shear rheology of the electrode slurry.

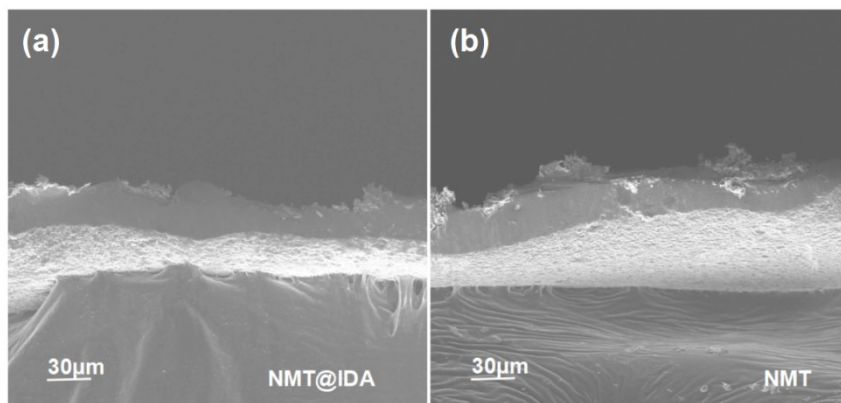

**Figure. S7.** SEM analyses for the morphology of (a) P2-NMT and (b) P2-NMT@IDA electrodes, in which show the cross-sectional images.

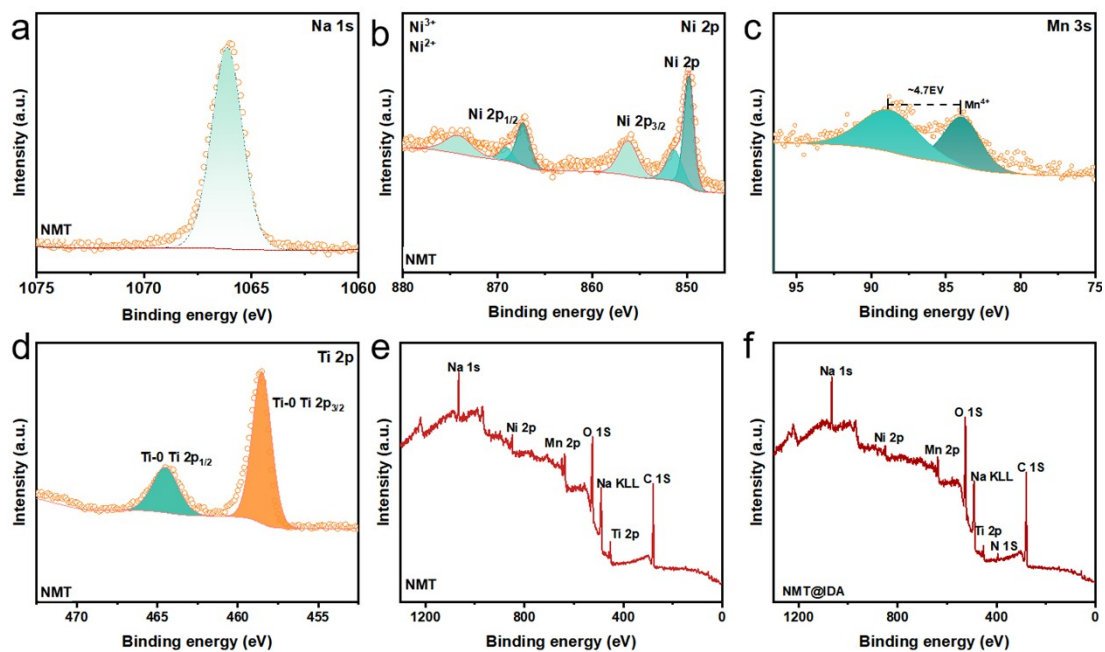

**Figure. S8.** High-resolution (a) Na 1s, (b) Ni 2p, (c) Mn 3s, (d) Ti 2p XPS spectrum of NMT sample. High-resolution (d-f) XPS full spectrum of NMT and NMT@IDA sample.

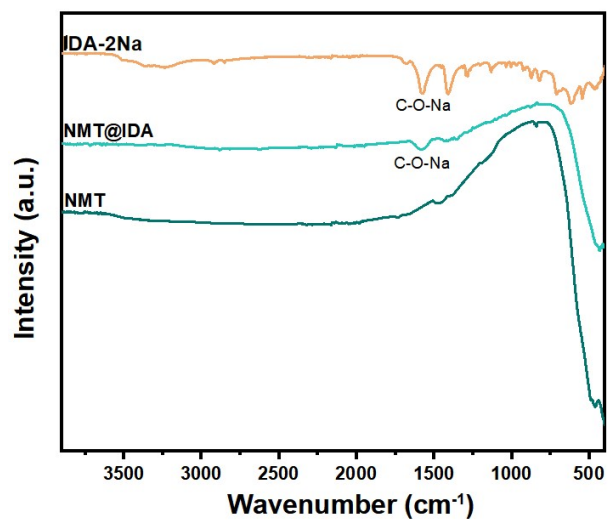

**Figure. S9.** FTIR spectra for P2-NMT, P2-NMT@IDA and IDA-2Na sample.

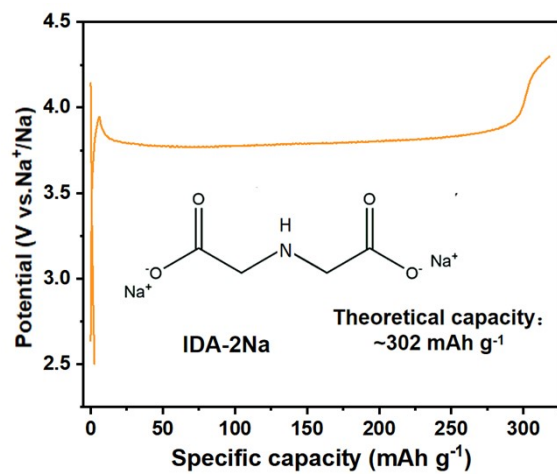

**Figure. S10.** Electrochemical properties of IDA-2Na at 0.1 C.

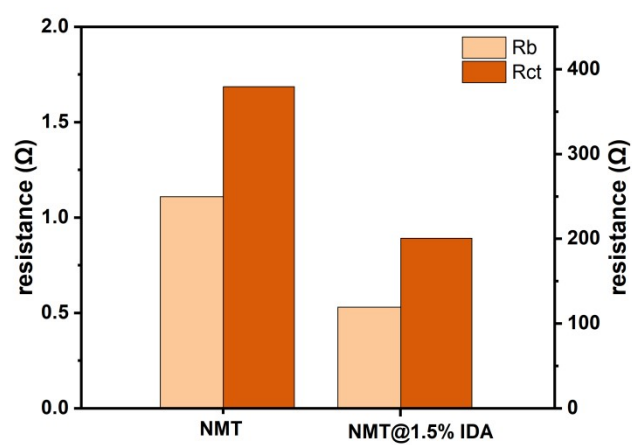

**Figure. S11.** The value of impedance parameters  $R_b$  and  $R_{ct}$  that received by fitting the Nyquist plots of P2-NMT and P2-NMT@IDA cathodes.

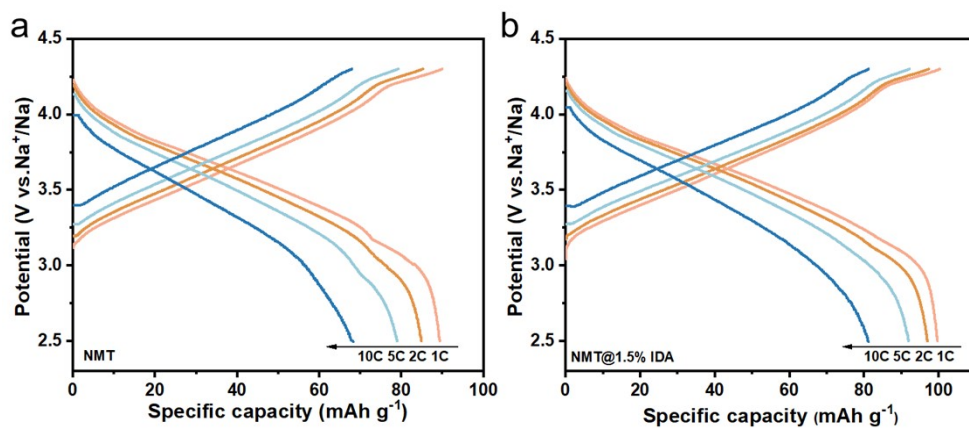

**Figure. S12.** The rate capabilities of P2-NMT and P2-NMT@IDA at different current densities. The charge/discharge curves of (a) P2-NMT||Na and (b) P2-NMT@IDA||Na cells at rates of 1, 2, 5, and 10 C.

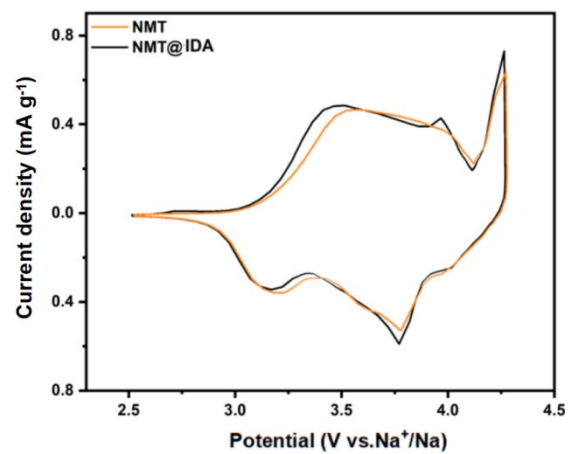

**Figure. S13.** CV curves of half-cells at 0.1 mV s<sup>-1</sup>.

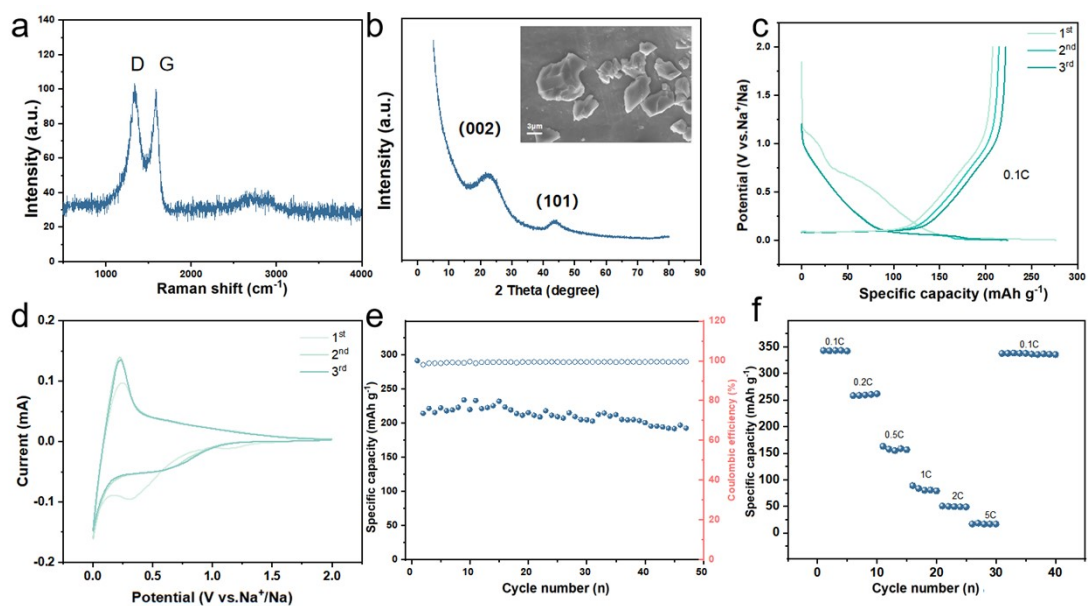

**Figure. S14.** Characterization of the structure and properties of hard carbon materials. (a) Raman spectrum. (b) SEM image and XRD pattern. (c) Charge and discharge profiles at 0.1 C in the voltage range of 0.01 to 2.0 V. (d) CV curves at 0.1 mV s<sup>-1</sup>. (e) Cycle performance and (f) rate performance.

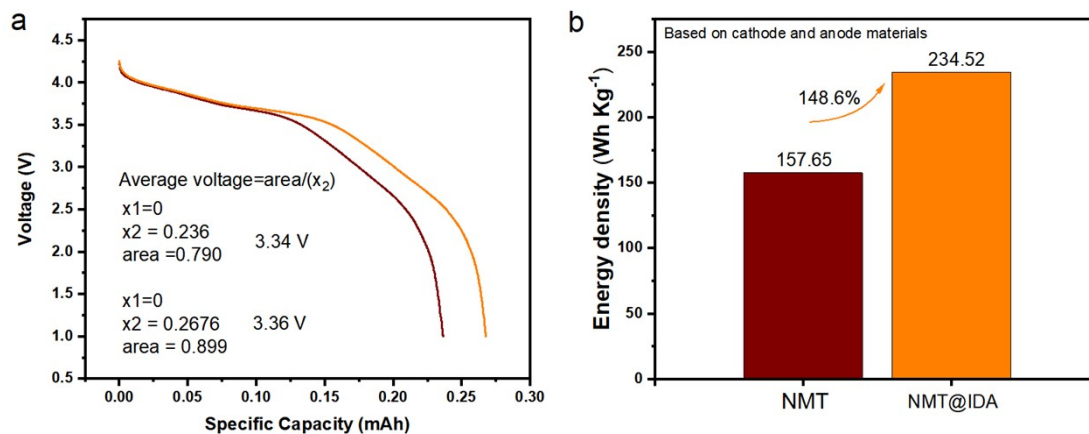

**Figure S15.** (a) Comparison of charge/discharge profiles energy density of NMT and NMT@IDA in full cells. (b) Integral results of the discharge profiles and the calculation of the corresponding average voltage.

**Table S1. Lattice parameters of P2-NMT and P2-NMT@IDA samples.**

| Sample                                                                              | a /Å     | b /Å     | c /Å      | $\alpha$ | $\beta$ | $\gamma$ |
|-------------------------------------------------------------------------------------|----------|----------|-----------|----------|---------|----------|
| $\text{Na}_{2/3}\text{Ni}_{1/3}\text{Mn}_{1/3}\text{Ti}_{1/3}\text{O}_2$            | 2.924025 | 2.924025 | 11.159918 | 90°      | 90°     | 120°     |
| $\text{Na}_{2/3}\text{Ni}_{1/3}\text{Mn}_{1/3}\text{Ti}_{1/3}\text{O}_2\text{@IDA}$ | 2.924835 | 2.924835 | 11.162878 | 90°      | 90°     | 120°     |

**Table S2.** Rietveld refinement of XRD data for P2-NMT.  
 NMT. Space group P63/mmc.  
 $a=b=2.924025 \text{ \AA}$ ;  $c=11.159918 \text{ \AA}$ ;  
 $\alpha=\beta=90^\circ$ ;  $\gamma=120^\circ$ ;  $V=82.633 \text{ \AA}^3$ .  
 $R_{wp}=4.64\%$ ;  $R_p=3.40\%$ .

| Atom            | x       | y       | z       | Occupancy |
|-----------------|---------|---------|---------|-----------|
| Na <sub>f</sub> | 0.00000 | 0.00000 | 0.25000 | 0.192     |
| Na <sub>e</sub> | 0.33333 | 0.66667 | 0.75000 | 0.475     |
| Mn              | 0.00000 | 0.00000 | 0.00000 | 0.333     |
| Ni              | 0.00000 | 0.00000 | 0.00000 | 0.333     |
| Ti              | 0.00000 | 0.00000 | 0.00000 | 0.333     |
| O               | 0.33333 | 0.66667 | 0.08391 | 1.000     |

**Table S3.** Rietveld refinement of XRD data for P2-NMT@IDA.  
NMT@IDA. Space group P63/mmc.  
a=b=2.924835 Å; c=11.162878 Å;  
 $\alpha=\beta=90^\circ$ ;  $\gamma=120^\circ$ ; V=82.701 Å<sup>3</sup>.  
R<sub>wp</sub>=5.07%; R<sub>p</sub>=3.64%;

| Atom | x       | y       | z       | Occupancy |
|------|---------|---------|---------|-----------|
| Naf  | 0.00000 | 0.00000 | 0.25000 | 0.192     |
| Nae  | 0.33333 | 0.66667 | 0.75000 | 0.475     |
| Mn   | 0.00000 | 0.00000 | 0.00000 | 0.333     |
| Ni   | 0.00000 | 0.00000 | 0.00000 | 0.333     |
| Ti   | 0.00000 | 0.00000 | 0.00000 | 0.333     |
| O    | 0.33333 | 0.66667 | 0.07980 | 1.000     |

**Table S4.** ICP-OES results for P2-NMT and P2-NMT@IDA.

| Sample                                                                       | CHNS Weight (mg)<br>by ICP-AES | Na (%)<br>by ICP-<br>AES | Ni (%)<br>by ICP-<br>AES | Ti (%)<br>by ICP-<br>AES |
|------------------------------------------------------------------------------|--------------------------------|--------------------------|--------------------------|--------------------------|
| $\text{Na}_{2/3}\text{Ni}_{1/3}\text{Mn}_{1/3}\text{Ti}_{1/3}\text{O}_2$     | 11.3                           | 13.9                     | 19.62                    | 14.6                     |
| $\text{Na}_{2/3}\text{Ni}_{1/3}\text{Mn}_{1/3}\text{Ti}_{1/3}\text{O}_2@IDA$ | 11.8                           | 14.5                     | 20.1                     | 15.9                     |

**Table. S5** Quantitative analysis of surface residual alkali in the pristine NMT sample.

| Sample | NaOH content (wt%) | Na <sub>2</sub> CO <sub>3</sub> content (wt%) |
|--------|--------------------|-----------------------------------------------|
| NMT    | 0.24 wt%           | 0.43 wt%                                      |

### Note S1

In this work, calculation of Stoichiometric IDA Requirement can be calculated based on the following two equations:

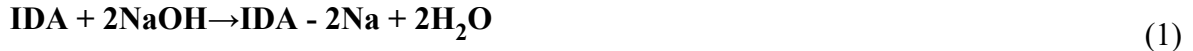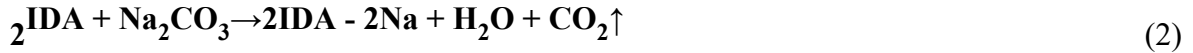

Calculations of IDA Requirement are based on the equations.

The formula is:

$$\text{IDA (\%)} = \frac{133.10}{2 \times M_{\text{NaOH}}} \times \text{NaOH content (wt\%)} + \frac{2 \times 133.10}{M_{\text{Na}_2\text{CO}_3}} \times \text{Na}_2\text{CO}_3 \text{ content (wt\%)},$$

where  $M_{\text{NaOH}}$  and  $M_{\text{Na}_2\text{CO}_3}$  are the relative molecular mass of NaOH and  $\text{Na}_2\text{CO}_3$ , respectively.

#### Specific calculation process based on the Table. S4:

##### 1. IDA required to neutralize NaOH

Molar mass: IDA = 133.10 g • mol<sup>-1</sup>, NaOH = 40.00 g • mol<sup>-1</sup>.

Stoichiometry: 1 mol IDA reacts with 2 mol NaOH.

Mass of IDA needed to neutralize 0.24 g NaOH per 100 g cathode:

$$133.10 \times 2 \times 0.24 \approx 0.40 \text{ g per } 100 \text{ g cathode} = 0.40 \text{ wt\%}$$

##### 2. IDA required to neutralize Na<sub>2</sub>CO<sub>3</sub>

Molar mass: Na<sub>2</sub>CO<sub>3</sub> = 105.99 g • mol<sup>-1</sup>.

Stoichiometry: 2 mol IDA reacts with 1 mol Na<sub>2</sub>CO<sub>3</sub>.

Mass of IDA needed to neutralize 0.43 g Na<sub>2</sub>CO<sub>3</sub> per 100 g cathode:

$$2 \times 133.10 \times 0.43 \approx 1.08 \text{ g per } 100 \text{ g cathode} = 1.08 \text{ wt\%}$$

##### 3. Total IDA required for complete neutralization:

$$0.40 \text{ wt\%} + 1.08 \text{ wt\%} = 1.48 \text{ wt\%}$$

##### 4. Practical application:

In the actual slurry environment, factors such as solubility of IDA in NMP, dispersion homogeneity, and surface accessibility may affect the reaction efficiency. A slight excess

(1.5 wt%) helps ensure complete neutralization and uniform coating formation.

Performance optimum: As shown in Fig. 4e-f, 1.5 wt% IDA delivered the best overall electrochemical performance, indicating that this loading balances complete alkali conversion with the formation of a functional interfacial layer without introducing excessive porosity or impedance.
